# Supplementary material for: Electronic transitions and vibrational properties of bulk and monolayer g-C3N4, and a g-C3N4/MoS2 heterostructure from a DFT study
Source: Royal Society of Chemistry journal article supplement (doi:10.1039/d4cp02289k), 2024-01-01
Supplement: d4cp02289k1.pdf [file d4cp02289k1.pdf]

## Electronic transitions and vibrational properties in bulk and monolayer g- $C_3N_4$ , and g- $C_3N_4/MoS_2$ heterostructure from DFT study.

A.S. Oreshonkov<sup>1,2,3</sup>, E.V. Sukhanova<sup>1</sup>, D.V. Pankin<sup>4</sup>, Z.I. Popov<sup>1</sup>

<sup>1</sup>Emanuel Institute of Biochemical Physics of Russian Academy of Sciences,  
Moscow 119334, Russia;

<sup>2</sup>Laboratory of Molecular Spectroscopy, Kirensky Institute of Physics, Federal  
Research Center KSC SB RAS, Krasnoyarsk 660036, Russia

<sup>3</sup>School of Engineering and Construction, Siberian Federal University,  
Krasnoyarsk 660041, Russia;

<sup>4</sup>Center for Optical and Laser Materials Research, Saint-Petersburg State  
University, Saint-Petersburg, 199034, Russia;

### Supporting information

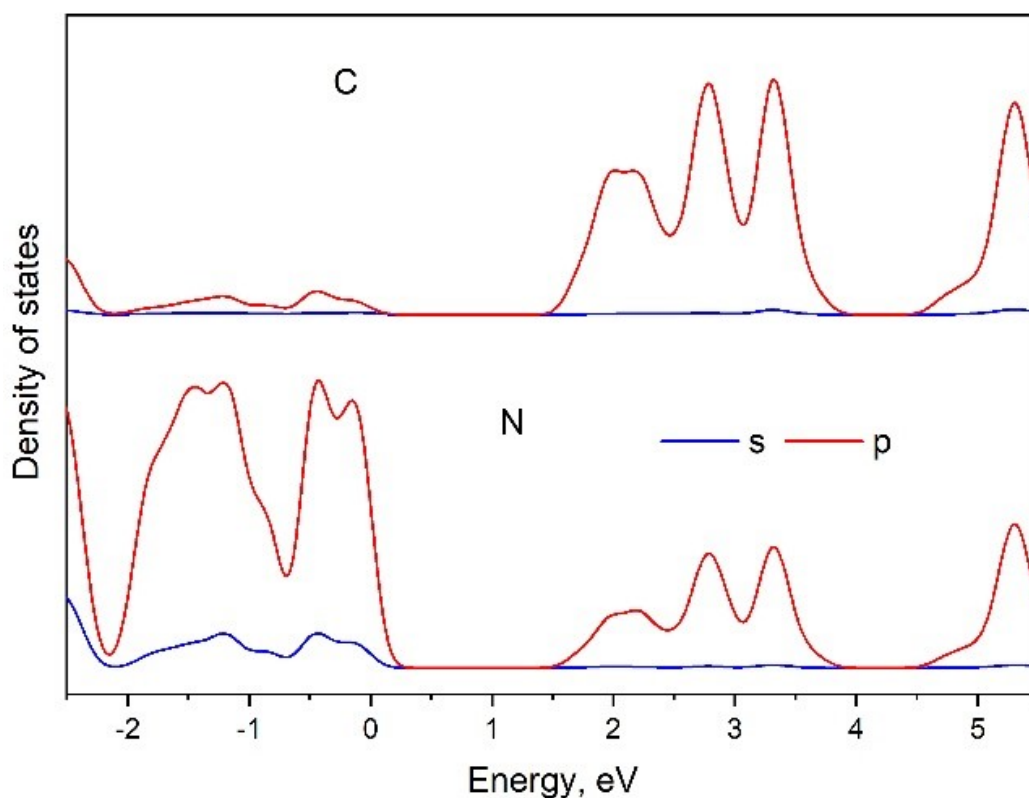

Figure S1. Density of states of the bulk "phase 1" g- $C_3N_4$ .

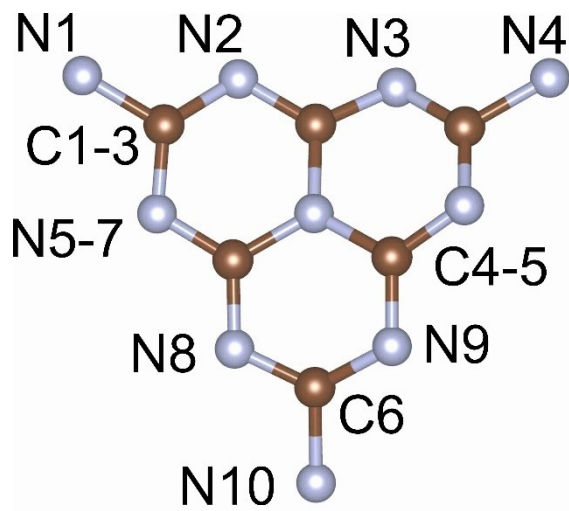

Figure S2. Designations of N and C ions in a structural triangle.

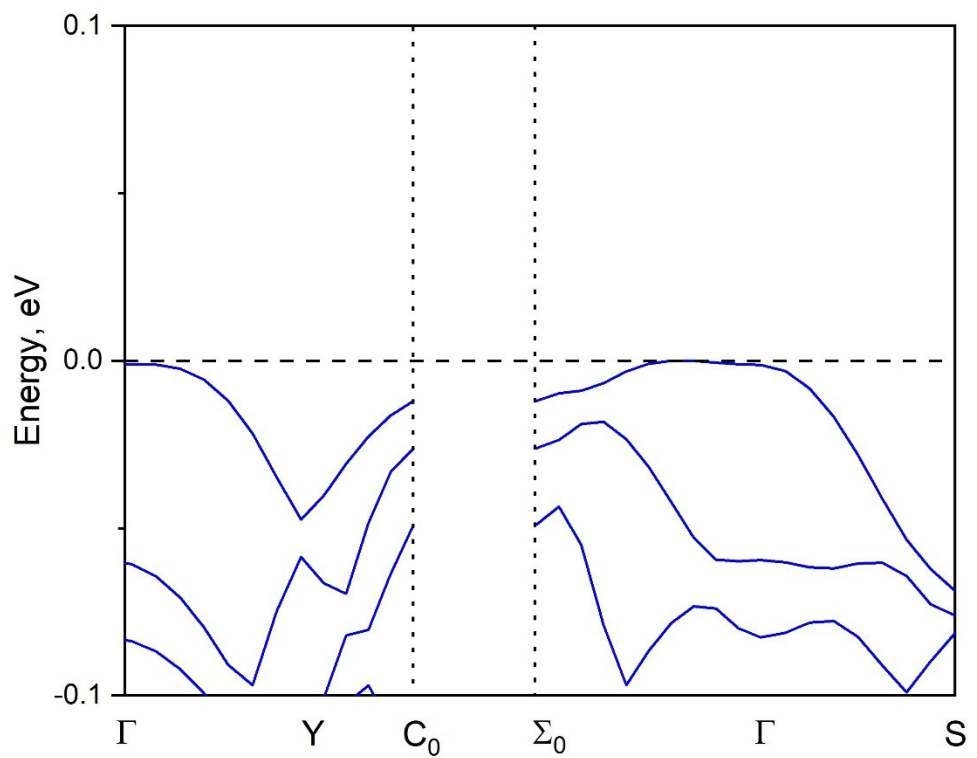

Figure S3. Electronic band structure of the  $g\text{-C}_3\text{N}_4/\text{MoS}_2$  heterostructure in the vicinity of the top of the valence band.

Table S1. Structural parameters for the bulk g-C<sub>3</sub>N<sub>4</sub> after PBE-TS optimization.

|                        | a        | b        | c        |
|------------------------|----------|----------|----------|
| cell length            | 6.9751   | 6.9751   | 6.7393   |
|                        | alpha    | beta     | Gamma    |
| angle                  | 90       | 90       | 119.7165 |
| fractional coordinates |          |          |          |
| atom                   | x        | y        | z        |
| N                      | -0.35674 | -0.98676 | 1.08120  |
| N                      | -0.99422 | -0.29558 | 0.90403  |
| N                      | -0.68057 | -0.65117 | 0.98830  |
| N                      | -0.01953 | -0.98047 | 1.00000  |
| N                      | -0.68312 | -0.31688 | 1.00000  |
| C                      | -0.90297 | -0.42307 | 0.93822  |
| C                      | -0.25444 | -0.10057 | 1.02776  |
| C                      | -0.89811 | -0.10189 | 1.00000  |
| C                      | -0.56763 | -0.43237 | 1.00000  |

Table S2. Structural parameters for the monolayer g-C<sub>3</sub>N<sub>4</sub> after PBE-TS optimization.

|                        | a       | b       | c        |
|------------------------|---------|---------|----------|
| cell length            | 6.9457  | 6.9455  | 26.1962  |
|                        | alpha   | beta    | Gamma    |
| angle                  | 90.7035 | 90.8741 | 119.7053 |
| fractional coordinates |         |         |          |
| atom                   | x       | y       | z        |
| N                      | 0.99098 | 0.28179 | 0.09768  |
| N                      | 0.01675 | 0.63581 | 0.10266  |
| N                      | 0.68411 | 0.64729 | 0.12013  |
| N                      | 0.02520 | 0.97479 | 0.12516  |
| N                      | 0.68791 | 0.31204 | 0.12515  |
| N                      | 0.35275 | 0.31582 | 0.13016  |
| N                      | 0.36436 | 0.98311 | 0.14772  |
| N                      | 0.71843 | 0.00883 | 0.15270  |
| C                      | 0.90544 | 0.41500 | 0.10744  |
| C                      | 0.90405 | 0.74014 | 0.11635  |
| C                      | 0.90316 | 0.09685 | 0.12518  |
| C                      | 0.57131 | 0.42869 | 0.12516  |

|   |         |         |         |
|---|---------|---------|---------|
| C | 0.25993 | 0.09588 | 0.13399 |
| C | 0.58514 | 0.09443 | 0.14293 |

Table S3. Comparison of bond lengths in the bulk structure and monolayer.

| Bond   | Bond length |           | Delta    |
|--------|-------------|-----------|----------|
|        | Bulk        | Monolayer |          |
| N1–C1  | 1.43551     | 1.42937   | 0.00614  |
| C1–N2  | 1.35300     | 1.35313   | -0.00013 |
| N2–C2  | 1.34029     | 1.34086   | -0.00057 |
| C2–N3  | 1.34540     | 1.34839   | -0.00299 |
| N3–C3  | 1.33979     | 1.34195   | -0.00216 |
| C3–N4  | 1.46480     | 1.46601   | -0.00121 |
| C1–N5  | 1.33385     | 1.33754   | -0.00369 |
| C2–N6  | 1.39551     | 1.40295   | -0.00744 |
| C3–N7  | 1.33979     | 1.34209   | -0.0023  |
| N5–C4  | 1.32816     | 1.32869   | -0.00053 |
| C4–N6  | 1.39326     | 1.40096   | -0.0077  |
| N6–C5  | 1.39551     | 1.40321   | -0.0077  |
| C5–N7  | 1.34540     | 1.34838   | -0.00298 |
| C4–N8  | 1.32816     | 1.32865   | -0.00049 |
| C5–N9  | 1.34029     | 1.34092   | -0.00063 |
| N8–C6  | 1.33385     | 1.33748   | -0.00363 |
| N9–C6  | 1.35300     | 1.35314   | -0.00014 |
| C6–N10 | 1.43551     | 1.42957   | 0.00594  |

Table S4. Structural parameters for the g-C<sub>3</sub>N<sub>4</sub>/MoS<sub>2</sub> after PBE-TS optimization.

|                        | a         | b         | c          |
|------------------------|-----------|-----------|------------|
| cell length            | 13.909838 | 36.799924 | 26.814604  |
|                        | alpha     | beta      | Gamma      |
| angle                  | 87.613153 | 92.500255 | 160.835729 |
| fractional coordinates |           |           |            |
| atom                   | x         | y         | z          |
| C                      | 0.339625  | 0.170847  | 0.437689   |
| C                      | 0.835025  | 0.169179  | 0.435816   |
| C                      | 0.336874  | 0.670174  | 0.437123   |
| C                      | 0.838495  | 0.670748  | 0.436821   |
| C                      | 0.497046  | 0.168522  | 0.444649   |
| C                      | 0.993763  | 0.167399  | 0.443214   |
| C                      | 0.494866  | 0.668072  | 0.444436   |
| C                      | 0.997780  | 0.669190  | 0.442805   |

|   |          |          |          |
|---|----------|----------|----------|
| C | 0.171602 | 0.166986 | 0.452961 |
| C | 0.670328 | 0.166405 | 0.452803 |
| C | 0.169084 | 0.666359 | 0.452557 |
| C | 0.668792 | 0.666061 | 0.452909 |
| C | 0.007320 | 0.001939 | 0.450632 |
| C | 0.505009 | 0.001110 | 0.450668 |
| C | 0.005593 | 0.501644 | 0.450805 |
| C | 0.507966 | 0.502215 | 0.448499 |
| C | 0.029583 | 0.345567 | 0.459400 |
| C | 0.525974 | 0.344832 | 0.459102 |
| C | 0.026359 | 0.844717 | 0.459760 |
| C | 0.528257 | 0.845428 | 0.459547 |
| C | 0.348649 | 0.006131 | 0.469350 |
| C | 0.849963 | 0.006642 | 0.469364 |
| C | 0.350231 | 0.506514 | 0.469342 |
| C | 0.846531 | 0.505807 | 0.468736 |
| N | 0.361804 | 0.214841 | 0.428275 |
| N | 0.857029 | 0.213221 | 0.427185 |
| N | 0.358013 | 0.713817 | 0.427609 |
| N | 0.857760 | 0.713736 | 0.427695 |
| N | 0.055726 | 0.224597 | 0.430176 |
| N | 0.561957 | 0.226931 | 0.433849 |
| N | 0.062590 | 0.727721 | 0.433106 |
| N | 0.559246 | 0.726314 | 0.433104 |
| N | 0.228712 | 0.058108 | 0.445634 |
| N | 0.726845 | 0.057432 | 0.446307 |
| N | 0.227163 | 0.557841 | 0.445952 |
| N | 0.729566 | 0.558702 | 0.441812 |
| N | 0.230561 | 0.227203 | 0.451981 |
| N | 0.732518 | 0.227629 | 0.452724 |
| N | 0.231504 | 0.727690 | 0.452309 |
| N | 0.729945 | 0.727025 | 0.452639 |
| N | 0.066037 | 0.060094 | 0.452987 |
| N | 0.563867 | 0.059314 | 0.452436 |
| N | 0.063979 | 0.559682 | 0.452894 |
| N | 0.566164 | 0.560142 | 0.452227 |
| N | 0.232200 | 0.392667 | 0.451965 |
| N | 0.729588 | 0.392100 | 0.453594 |
| N | 0.228838 | 0.891567 | 0.453479 |
| N | 0.730683 | 0.892258 | 0.453255 |
| N | 0.075109 | 0.395989 | 0.474459 |
| N | 0.570011 | 0.395060 | 0.472955 |
| N | 0.072733 | 0.895542 | 0.474403 |
| N | 0.573894 | 0.896030 | 0.474069 |
| N | 0.434199 | 0.070826 | 0.478520 |

|    |          |          |          |
|----|----------|----------|----------|
| N  | 0.934674 | 0.071115 | 0.478415 |
| N  | 0.433597 | 0.570530 | 0.478627 |
| N  | 0.931091 | 0.570219 | 0.477884 |
| S  | 0.972173 | 0.006337 | 0.317550 |
| S  | 0.919949 | 0.216422 | 0.315997 |
| S  | 0.708446 | 0.058632 | 0.316290 |
| S  | 0.864228 | 0.426146 | 0.317226 |
| S  | 0.656300 | 0.269376 | 0.316631 |
| S  | 0.446628 | 0.111538 | 0.317423 |
| S  | 0.811237 | 0.636697 | 0.316702 |
| S  | 0.601433 | 0.478866 | 0.317463 |
| S  | 0.390922 | 0.320910 | 0.316876 |
| S  | 0.178958 | 0.162966 | 0.316254 |
| S  | 0.762090 | 0.848317 | 0.317996 |
| S  | 0.550395 | 0.689769 | 0.317077 |
| S  | 0.339651 | 0.532080 | 0.317323 |
| S  | 0.128714 | 0.374015 | 0.317217 |
| S  | 0.498103 | 0.901019 | 0.317350 |
| S  | 0.286230 | 0.742472 | 0.317709 |
| S  | 0.074079 | 0.583641 | 0.317351 |
| S  | 0.236289 | 0.953677 | 0.317464 |
| S  | 0.026352 | 0.796411 | 0.316737 |
| S  | 0.960964 | 0.005510 | 0.199489 |
| S  | 0.909439 | 0.216798 | 0.198633 |
| S  | 0.697877 | 0.058386 | 0.198287 |
| S  | 0.858211 | 0.427678 | 0.198913 |
| S  | 0.646533 | 0.269332 | 0.198965 |
| S  | 0.434134 | 0.110839 | 0.199276 |
| S  | 0.804150 | 0.637538 | 0.199208 |
| S  | 0.594689 | 0.480123 | 0.199103 |
| S  | 0.385732 | 0.322841 | 0.198598 |
| S  | 0.172675 | 0.163926 | 0.198598 |
| S  | 0.751099 | 0.848092 | 0.199773 |
| S  | 0.541836 | 0.690710 | 0.199363 |
| S  | 0.330759 | 0.532532 | 0.198975 |
| S  | 0.119519 | 0.374347 | 0.198962 |
| S  | 0.486852 | 0.899968 | 0.198949 |
| S  | 0.278668 | 0.743019 | 0.199685 |
| S  | 0.069190 | 0.585798 | 0.199568 |
| S  | 0.223509 | 0.953117 | 0.199053 |
| S  | 0.014502 | 0.795441 | 0.198794 |
| Mo | 0.789860 | 0.040528 | 0.257402 |
| Mo | 0.949618 | 0.409683 | 0.258033 |
| Mo | 0.738635 | 0.251522 | 0.258085 |
| Mo | 0.528269 | 0.093703 | 0.258022 |

|    |          |          |          |
|----|----------|----------|----------|
| Mo | 0.896090 | 0.619669 | 0.258379 |
| Mo | 0.685477 | 0.461888 | 0.258198 |
| Mo | 0.475707 | 0.304257 | 0.257712 |
| Mo | 0.264928 | 0.146327 | 0.257969 |
| Mo | 0.844251 | 0.830690 | 0.258649 |
| Mo | 0.634283 | 0.672821 | 0.258052 |
| Mo | 0.421568 | 0.514280 | 0.258004 |
| Mo | 0.212871 | 0.357006 | 0.257999 |
| Mo | 0.002580 | 0.199105 | 0.257226 |
| Mo | 0.580294 | 0.883018 | 0.258584 |
| Mo | 0.371071 | 0.725493 | 0.259028 |
| Mo | 0.159382 | 0.567115 | 0.258297 |
| Mo | 0.317557 | 0.935879 | 0.257592 |
| Mo | 0.107428 | 0.778059 | 0.258134 |
| Mo | 0.054388 | 0.988325 | 0.258749 |

---
